# Supplementary material
Source: PubMed Central journal article supplement (PMC3289347)
Supplement: 1121538109_sapp.pdf [file 1121538109_sapp.pdf]

Gowher\_S1

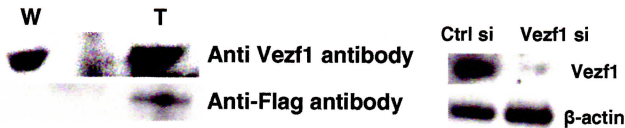

Gowher\_S2

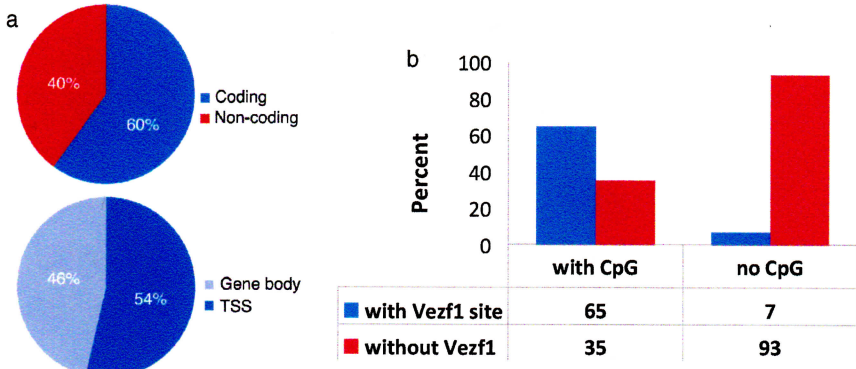

Gowher\_S3

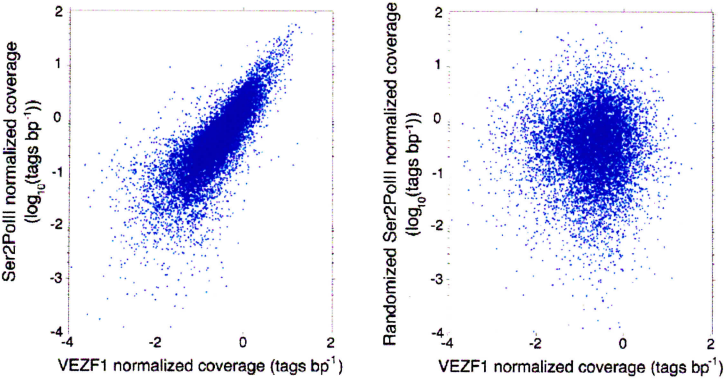

a

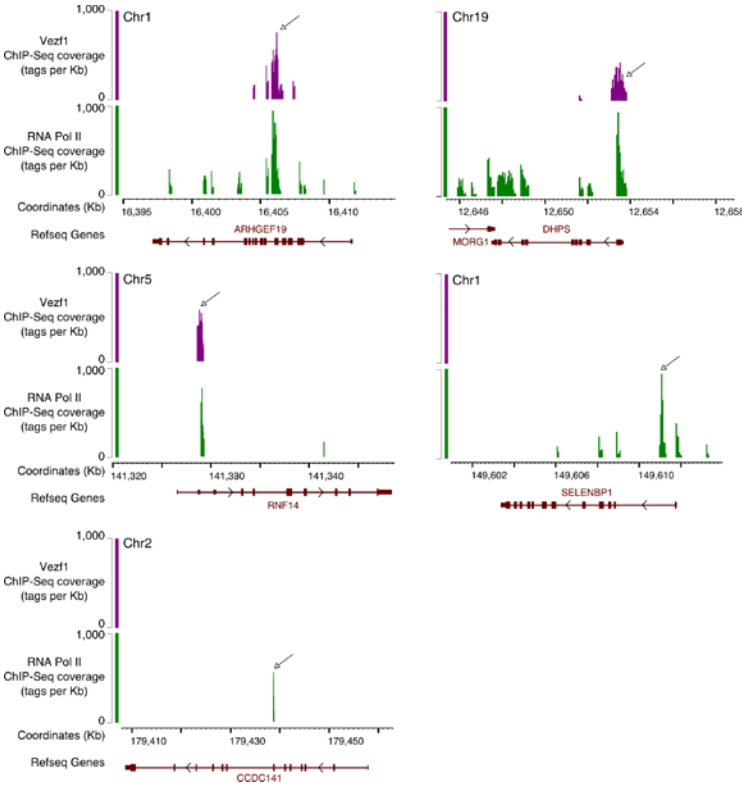

b

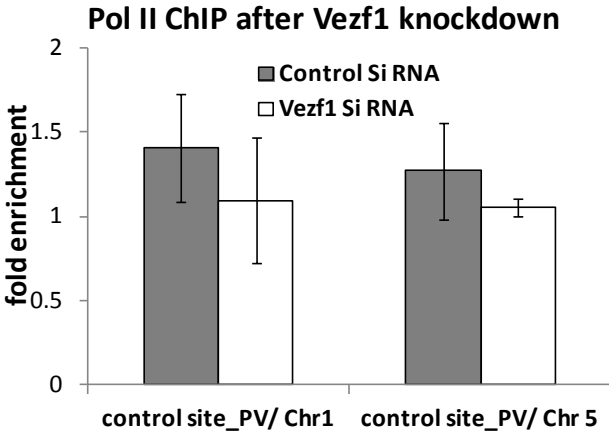

a

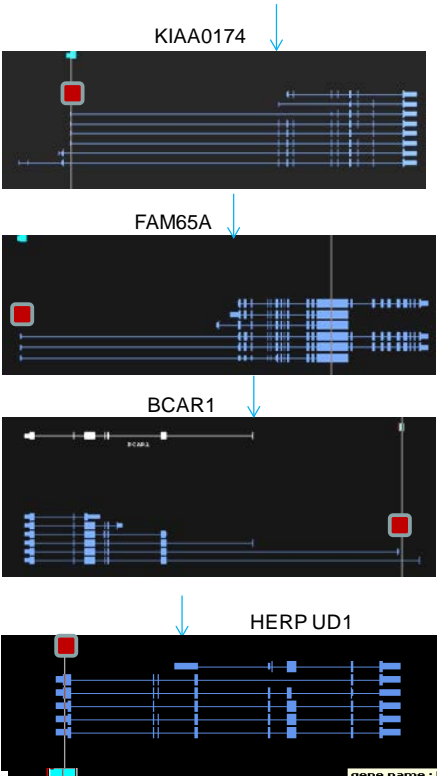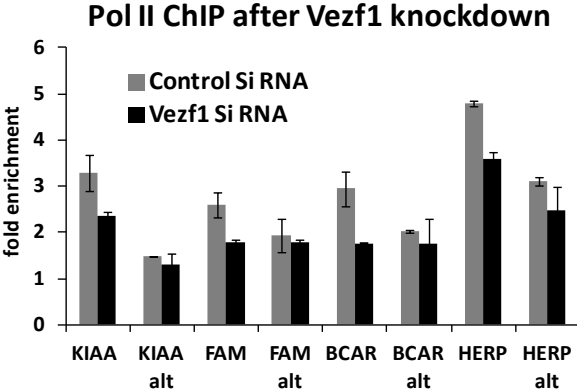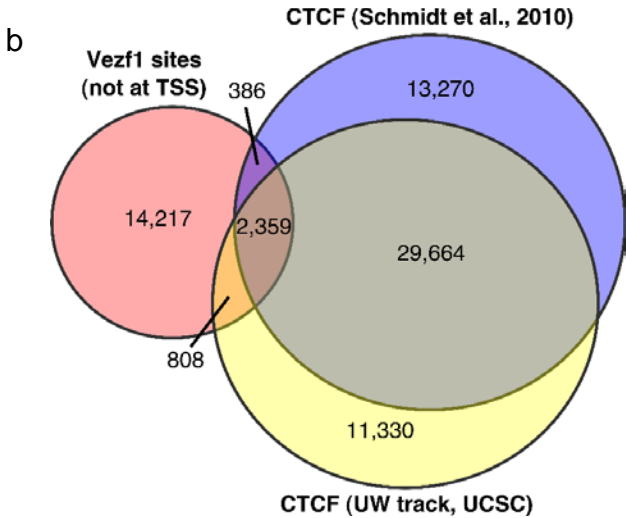

a

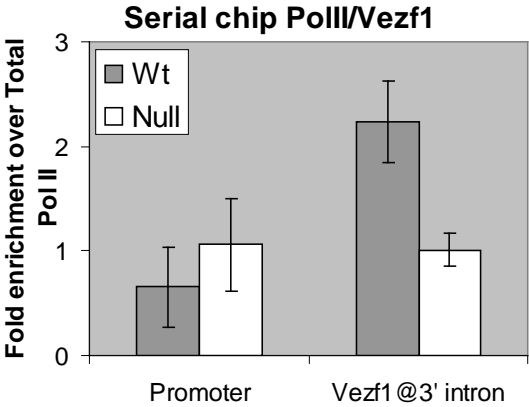

b

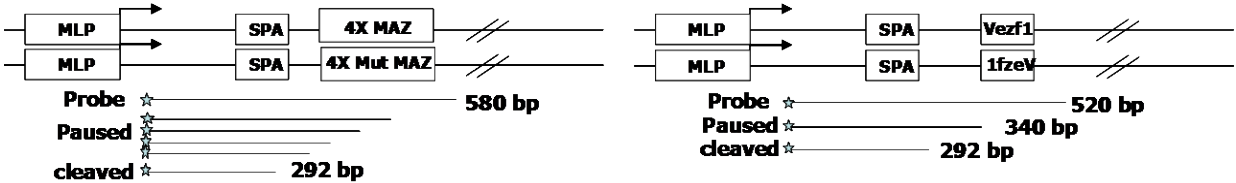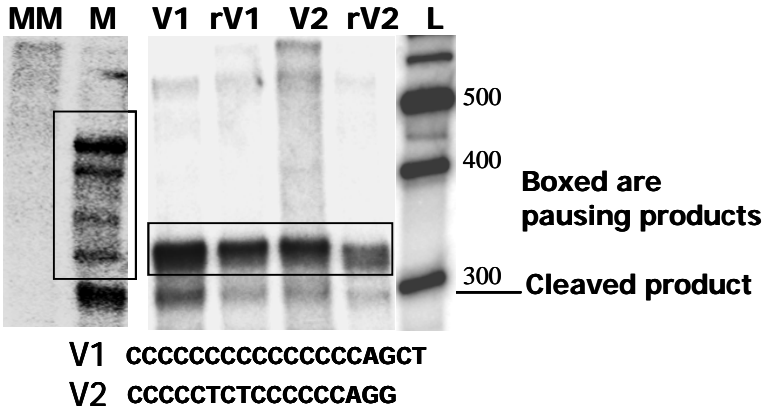

a

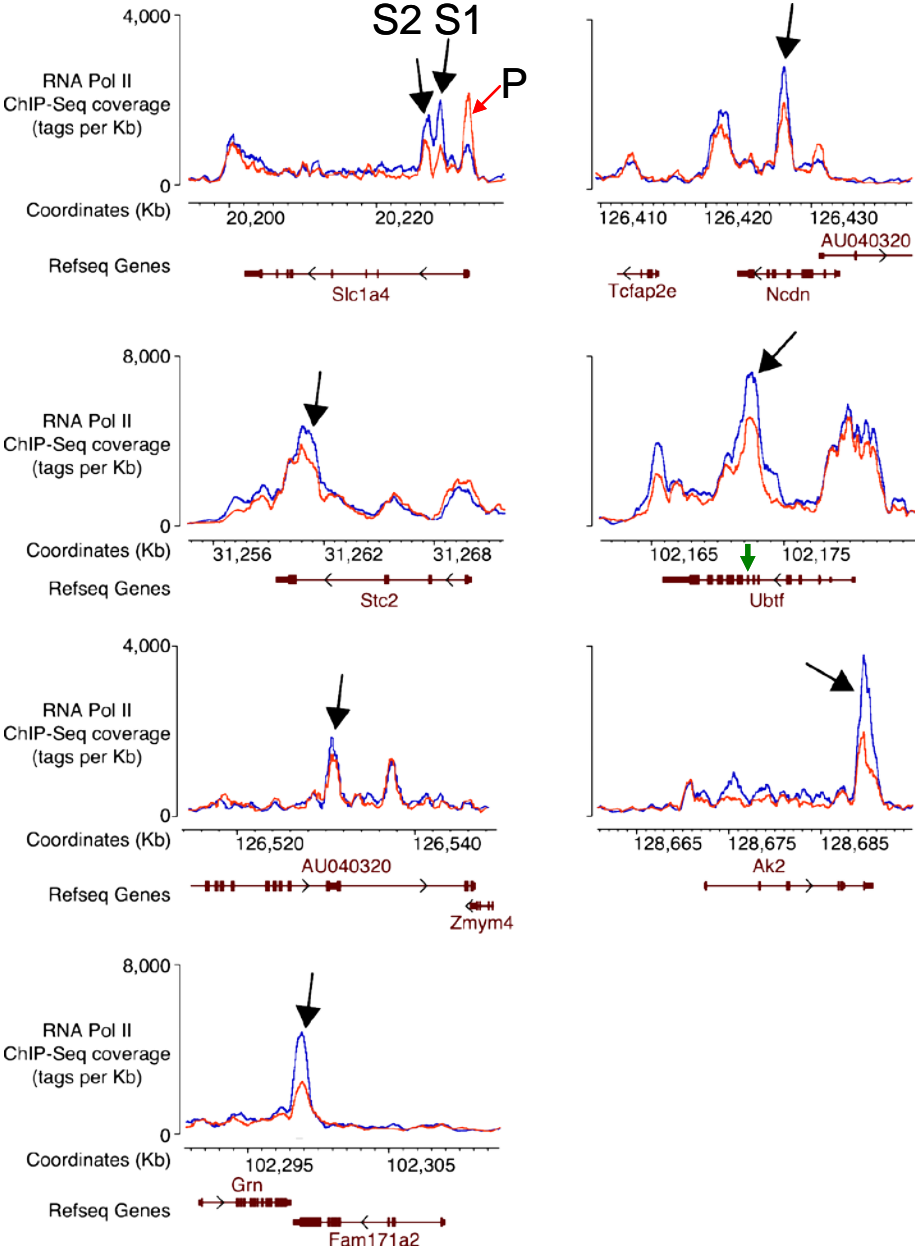

b

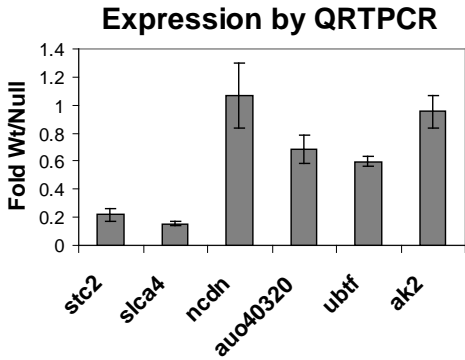

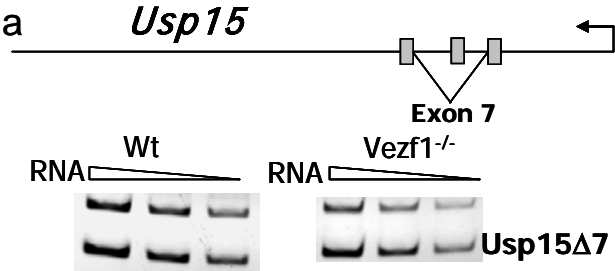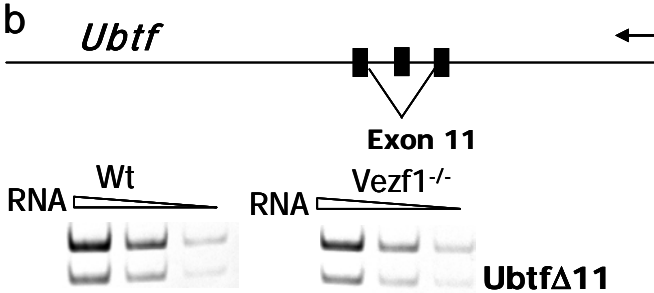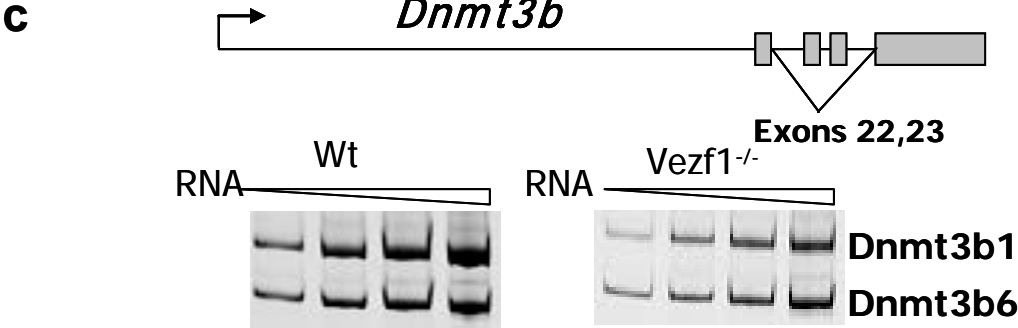

Gowher\_S9

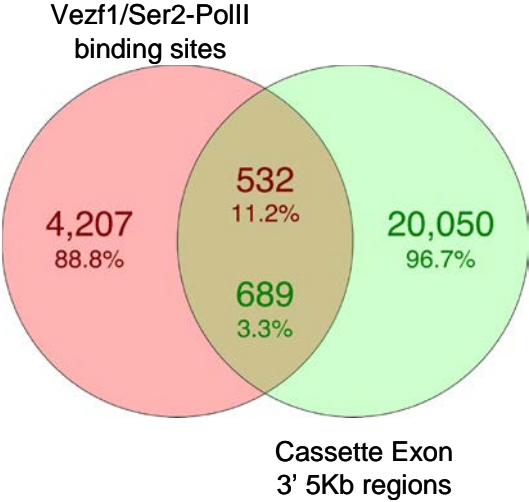

Gowher\_S10

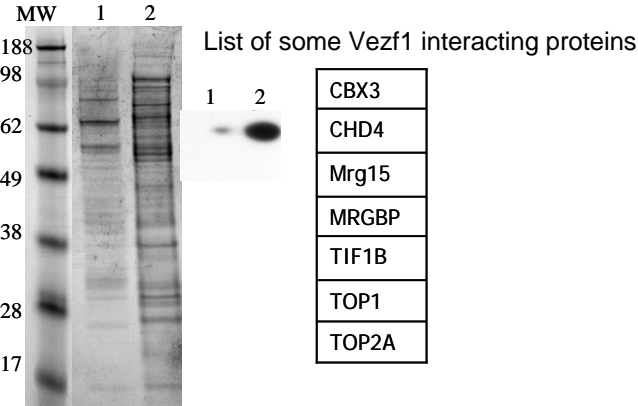

Gowher\_S11

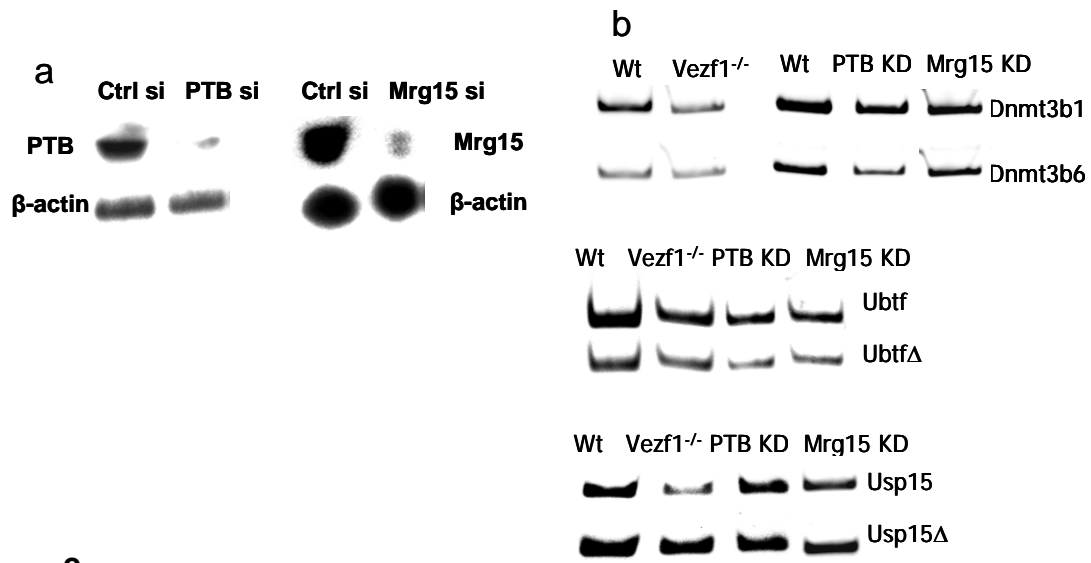

**c**

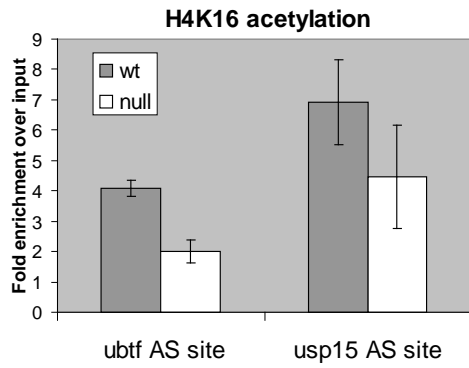



Mean per chromosome Spearman CCs for all HELA Vezf1/ Ser2-Pol II pools and replicates

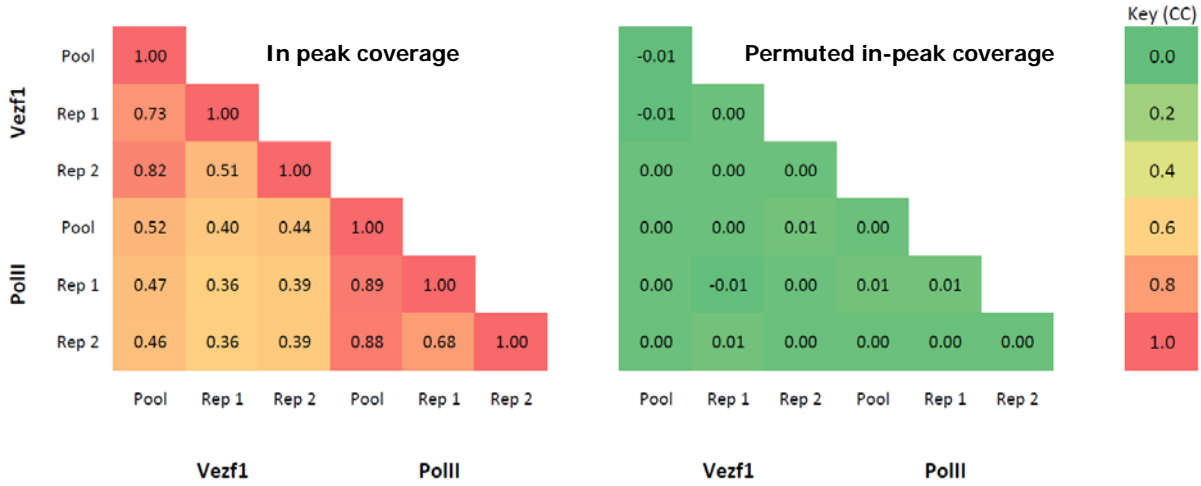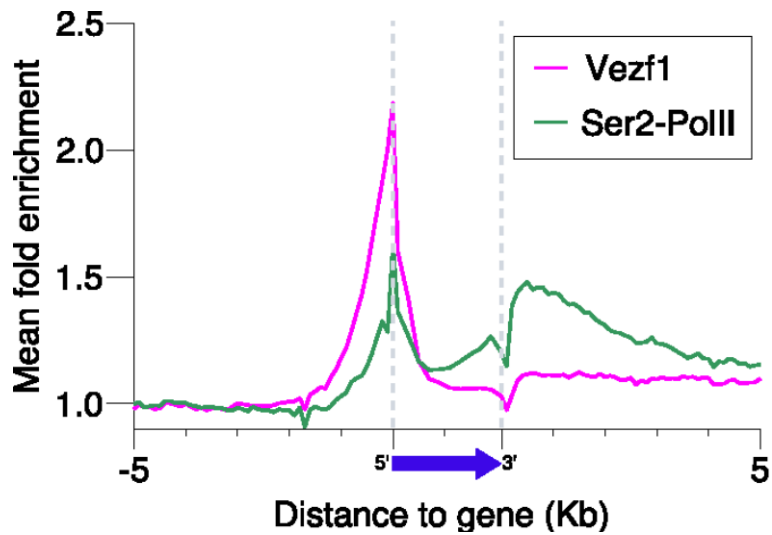

## Supplementary Figure legends

S1. Left panel: Western blot showing the expression of Vezf1 and Flag-HA Vezf1 in the untransfected (W) and transfected (T) HeLa S3 cells. The same blot was serially probed with anti Vezf1 antibody and anti Flag antibody. Right panel: Gel shows the western blot of the total cell extract from HeLaS3 treated with either Control siRNA or Vezf1siRNA for 42 hrs.

S2. a) The genome-wide localization of Vezf1 binding sites. Coding regions are defined as the DNA between all annotated start and stop codons. Transcription start sites (TSSs) are defined as start codons  $\pm$  500bp. Intergenic and coding regions which overlap TSS regions are classified as TSS and thus excluded from their respective datasets. b) Vezf1/Ser2-Pol II co-binding sites are preferentially found at CpG island containing promoters, defined as those promoters with an annotated CpG island (from UCSC CpG islands table) within 500nt of the transcription start site.

S3. In-gene Vezf1 coverage is correlated with in-gene Ser2-Pol II coverage. The background subtracted Vezf1 and Ser2-Pol II tag counts were compared in all in-gene non overlapping 50-nt windows. The distributions were highly correlated (Spearman's  $R = 0.81$ ). Randomization of Ser2-Pol II values abolished all correlation (Spearman's  $R = 0.01$ ) though this is an excessively punitive comparison which does not take into account local biases in the genomic sequence.

S4. a) Schematic of sites selected for study, showing distribution before knockdown of bound Vezf1 and Ser2P-Pol II. ChIP-Seq tag density is plotted in non-overlapping 50 nt windows. Each ChIP-Seq tag was extended 150nt in the 3' direction from the tag start. Coverage is only shown for statistically enriched regions (see Methods). b) HeLa S3 cells were treated with siRNA to knock down the expression of endogenous Vezf1. Crosslinked chromatin was immunoprecipitated using anti Ser2Phos Pol II antibody followed by quantitative

PCR using Taqman probes. In the bar diagram, control site\_PV indicates the region upstream of where Pol II peaks overlap with Vezf1 binding sites.

S5. a) Role of Vezf1 in alternate promoter usage. Left panels are schematic of sites selected for study, showing alternative transcripts and start sites of the genes. Red square shows the position of Vezf1/Ser2Pos-Pol II peaks at the promoters and the blue arrows point to the alternate promoter site and primers for PCR were designed in these regions. Vezf1 was knocked down and Ser2Phos-Pol II occupancy was assayed by CHIP/QPCR. b) CTCF sites were obtained from (1) or from the UW Histone modifications track of the UCSC genome browser. Only Vezf1 sites outside of TSS regions were considered. Each feature (Vezf1 / CTCF sites) was expanded to 1 Kb around the centre point then overlaps between features were counted.

S6. a) . Chromatin immunoprecipitation followed by quantitative PCR using Taqman probes. Crosslinked chromatin from Wt and Vezf1<sup>-/-</sup> (Null) ES cells was serially immunoprecipitated first with this anti Pol II antibody and then with anti Vezf1 antibody. b) S1 nuclease protection assay. A template containing both, a downstream synthetic polyadenylation signal and, farther 3', a binding site for (in this case) Vezf1, was transcribed in Hela nuclear extract. The probes used could hybridize to the transcript beyond the Vezf1 sites, allowing detection of pausing. When Vezf1 sites were introduced the major transcript terminated at those sites. A shorter transcript was also seen, since pausing leads to cleavage coupled to activation of polyadenylation. This effect was observed with the Vezf1 sites in either orientation; the band intensity indicates a modest preference for C in the top strand. Lanes V1, rV1, V2 and rV2 show a single strong band representing Pol II pausing at the Vezf1 binding site. The positive control (lane M) confirmed the earlier published *in vitro* experiments<sup>13</sup> in which tandem binding sites for the protein factor MAZ were found to cause RNA Pol II pausing. No pausing is observed in the control lacking MAZ or Vezf1 sites (lane MM).

S7. a) Ser2P-Pol II signal is amplified at some sites in Vezf1<sup>-/-</sup> ES cells. Ser2-Pol II CHIP-Seq tag density is plotted in 1Kb windows with a step size of 100nt. Each

ChIP-Seq tag was extended 150nt in the 3' direction. Blue lines represent Ser2-Pol II coverage in WT cells, red lines in *VeZF1*<sup>-/-</sup> cells. Black arrows indicate the sites chosen for subsequent quantitative measurement of *VeZF1* and Pol II binding by ChIP-QPCR. These sites have significantly higher Ser2-Pol II ChIP-Seq coverage in *VeZF1*<sup>-/-</sup> cells than in WT. The red arrow on the *slc1a4* gene points to the promoter and the green arrow on *ubtf* points to the alternatively spliced exon. b) One step RT-PCR was performed with total RNA from Wt and *VeZF1*<sup>-/-</sup> cells;  $\beta$ -actin RNA was the control for the amount of RNA template used as input.

S8. Illustrations of *Usp15*, *Ubtf* and *Dnmt3b* genes showing cassette exons. Gels show two alternatively spliced isoforms by RT PCR analysis using RNA from Wt or *VeZF1*<sup>-/-</sup> ES cells at the highest concentration of 1ng followed by two fold dilutions. The primers flank the alternatively spliced exons.

S9. Incidence of *VeZF1*/Ser2-Pol II co-binding sites downstream of cassette exons. The 3' regions of cassette exons and *VeZF1*/Ser2-Pol II co-binding sites within  $\pm 1$ Kb of TSS of were not considered.

S10. SDS PAGE showing immunoprecipitated nuclear extracts from the untransfected (lane1) and transfected (lane 2) mouse ES cells using anti-V5 antibody. The small right panel is the western blot with anti-V5 antibody. The lanes 1 and 2 were excised from the gel and the proteins were identified by Mass spectrometry (MS). The right panel is the list of some chromatin binding proteins that were identified by MS.

S11. a) Western blot using anti *Mrg15*, *PTB* and  $\beta$ -actin antibodies after siRNA knockdown of indicated proteins in mouse ES cells. b) RTPCR analysis showing the affect of siRNA knockdown of indicated factors on the transcription/alternative splicing of *dnmt3b*, *ubtf* and *usp15* genes. c) ChIP showing the H3k16 acetylation levels at the alternative spliced exons of the *ubtf* and *usp15* genes in Wt and *VeZF1*<sup>-/-</sup> ES cells.

S12. Vezf1 and Ser2P-Pol II ChIP-Seq profiles are highly reproducible. The ChIP-Seq tag coverage in non-overlapping 1Kb bins was calculated. The heat map displays the mean per chromosome Spearman's R for each pair of ChIP-Seq samples.

S13. Vezf1 and Ser2P-Pol II ChIP-Seq coverage across protein coding regions. Data are plotted in non-overlapping 100nt windows. For each sample, coverage was normalized by the sample-specific background (mean signal in 50-100 Kb region upstream of TSS) before calculating fold enrichment over input DNA signal (also normalized). In-gene coverage was calculated in 10 evenly spaced bins for each gene and genes were aligned and oriented at the TSS (genes illustrated as blue arrow). Thick, dashed grey lines represent the start (TSS) and stop (3') codons respectively.

## Supplementary methods

### Sequencing:

Sequencing was performed on an Illumina GAII. Quality filtered reads were aligned to version hg18 of the human genome using the Illumina GA Pipeline version 1.6. Samples were pooled and 42 million tags were randomly selected from each to create equal sized datasets.

### In-gene coverage

Given that the majority of Vezf1 binding sites were located in and around coding regions, we focused on their relationship with Ser2P-Pol II in the neighborhood of genes. We calculated the average tag density across all genes for Ser2P-Pol II and Vezf1. We calculated the average tag density across all genes for Ser2P-Pol II and Vezf1 (Fig. S.13). As reported earlier (2) we see a gradual increase in the accumulation of Ser2P-Pol II signal towards the 3' end of the genes. This characteristic feature is absent in the average Vezf1 binding profile which shows a sharp peak at the TSS. The entire set of hg18 transcripts was obtained from the hg18 RefSeq annotation table in UCSC. A non-redundant gene set was generated using the most extreme 5' and 3' ends of all alternative forms of each gene. The background subtracted coverage of Vezf1 and Ser2P-Pol II was calculated across each gene and the resultant value was normalized by gene length. The Spearman correlation coefficient was calculated between the normalized strength vectors for Vezf1 and Ser2P-Pol II. To assess the significance of the correlation, the strength values for Ser2P-Pol II were randomly permuted.

Putative transcription start sites were defined as the 5' ends of RefSeq transcripts  $\pm$  500bp. We observed peaks in both Ser2P-Pol II and Vezf1 coverage at the 5' end of genes. Such a striking pattern of Ser2P-Pol II coverage at the 5' end of genes was unsurprising given recent data(3). Ser2P-Pol II coverage also increased at the 3' end of genes, as expected for the elongating form of this enzyme.

### **Repeat associations:**

Repeats in the human genome were obtained from the repeatmasker database. Randomized peaks were generated by re-distributing peak centers uniformly in non-gap regions of the genome. The overlap of each repeat class in peaks was compared to the expected overlap, as derived from 1,000 sets of randomized peaks. The significance of enrichment was calculated using a one sided binomial test for each repeat class. Bonferroni correction was applied to account for multiple testing.

### **Enrichment in alternative transcription events:**

A list of annotated alternative transcription events was obtained from the alt Events table in UCSC for the human genome version hg18. The expected overlap was generated by permuting the genomic features in question. For cassette exon 3' 5Kb regions, the 3' 5Kb region was identified for all non-cassette exons in the genome. Those regions overlapping TSS were not considered. 10,000 subsets were generated, each with a matching number of randomly selected exon 3' 5Kb regions. The mean overlap with these randomly attributed cassette exon 3' 5Kb regions was used as the expected overlap percentage. For alternative promoter associations at the TSS, the same permutation-based approach was used, albeit for those TSS which did not contain a Vezf1/ Ser2-Pol II peak.

### **S1 Nuclease Assay**

HeLa S3 nuclear extracts were purified as described (4) . MLP III DNA templates were a kind gift from Dr Nick Proudfoot (4). The MAZ sites in pMLP III were replaced by *dnmt3b* Vezf1 binding sites in forward and reverse orientation. In vitro transcription using 10 $\mu$ l of HeLa S3 nuclear extract and 200ng of linearized template at 30C for 1 hr and the transcripts were essentially purified as described (5). Specific probes were PCR amplified from different pMLP III constructs, purified and cleaved with Sap I, end-filled using radiolabelled dGTP thus allowing only the template strand to be radiolabelled. The probe was mixed with transcribed RNA in 80% formamide buffer and annealed at 52°C overnight. The

mixture was treated with SI nuclease to cleave single stranded DNA or RNA; DNA/RNA hybrids are protected. Ethanol precipitated RNA/DNA hybrid was resolved on 6% urea/acrylamide gels.

### **Chromatin Immunoprecipitation and antibodies**

Crosslinking for all the cell types used was carried out for 3 mins in 1% formaldehyde. The protocol for chromatin preparation was followed as described (6). For Flag-HA-Vezf1 ChIP, Flag M2 Agarose (Sigma) was used for immunoprecipitation. For ChIP-Seq, crosslinked chromatin from  $10^7$  cells and 60 $\mu$ g of antibody was used for each immunoprecipitation. Purified DNA was subjected to end-repair and adapter ligation using a sample preparation kit from Illumina according to the manufacturer's protocol. Antibodies used for Ser2 Phosphorylated RNA Pol II; (ab5095), Mrg15 (ab-84520-50), and for histone modifications were purchased from ABCAM, and PTB antibody (32-4800) from Invitrogen.

### **RT-PCR and Quantitative PCR analysis**

RNA was purified using RNeasy Mini Kit (Qiagen), treated with DNase (Roche) and was reverse transcribed using the 1 Step RT-PCR kit (Invitrogen). The primers for the semi-quantitative PCR were chosen to target the exon-intron boundaries such that it allows the amplification of alternatively spliced isoforms. All the RT-PCR products were in the size range of 200-500 bp. For the gene expression analysis, the quantitative RT-PCR procedures used TaqMan® One-Step RT-PCR Master Mix and TaqMan® Gene Expression Assays in ABI PRISM 7900 Sequence Detection System (Applied Biosystems). Quantitative PCR for ChIP studies was carried out on the same instrument with primer-probe sets designed using the software Primer Express. The analysis was done as described (7).

### **SiRNA Knockdown**

Downregulation of PTB and Mrg15 in mouse ES cells was performed using ON-TARGET plus SMARTpool siRNA oligonucleotides.  $2 \times 10^6$  ES cells in 100 $\mu$ l of



Amaya Mouse ES cell Nucleofactor solution (Lonza) were transfected with 5 $\mu$ M PTB or Mrg15 siRNA according to the manufacturer's protocol and were harvested after 48 hrs. For Vezf1 knockdown, 1x10<sup>6</sup> HeLa S3 cells in 100 $\mu$ l of Amaya Nucleofactor Kit L solution were transfected with 3 $\mu$ M of Vezf1 ON-TARGET plus SMARTpool siRNA oligonucleotides or control siRNA and harvested after 48 hrs. For chromatin preparation, 10<sup>7</sup>, HeLa S3 cells were directly crosslinked by treatment with 1% formaldehyde followed by the ChIP protocol as described above.

### **Nuclear Run-on assay**

Nuclei were isolated and nuclear run-on reactions were performed as described (8). RNA was purified by TRIzol according to the manufacturers' instructions. 80-120 bp amplicons at the 5' end, in the gene body and 3' end of *dnmt3b* gene were used as probes. 1 $\mu$ g of DNA probe was denatured in 100 $\mu$ l of 0.5M NaOH and slot-blotted on GeneScreen Plus Nylon membrane. Filters were neutralized with 100mM Tris-HCl, pH8, UV crosslinked, prehybridized and hybridized in 50% formamide, 5XSSC, 5X Denhardt's solution, 1%SDS and 100 $\mu$ g/ml boiled herring sperm DNA.

### **Immunoprecipitation (IP) and Mass spectrometry.**

Vezf1 was cloned in pCDNA Topo V-5 His and expression of the protein was verified by WB using anti V-5 ab. Total nuclear extracts from the transfected and untransfected ES cells was prepared by using a nuclear extract /Co IP kit from Active Motif. V5-Vezf1 protein complex was co-immunoprecipitated from nuclear extracts on V-5 beads (sigma) using buffers and instructions from Active Motif. Control IP was performed with nuclear extracts from Wt cells. The immunoprecipitated proteins were separated by SDS gel electrophoresis. Both the IP and control gel lanes were cut into 4 pieces each and used for peptide analysis by mass spectrometry at Taplin Biological Mass Spectrometry Facility (<http://gygi.med.harvard.edu/>). The list of proteins from the control lane was subtracted from the list of interacting proteins identified from the IP lane.

1. Schmidt D, *et al.* (A CTCF-independent role for cohesin in tissue-specific transcription. *Genome Res* 20(5):578-588.
2. Rahl PB, *et al.* (c-Myc regulates transcriptional pause release. *Cell* 141(3):432-445.
3. Gilchrist DA, *et al.* (Pausing of RNA polymerase II disrupts DNA-specified nucleosome organization to enable precise gene regulation. *Cell* 143(4):540-551.
4. Ashfield R, *et al.* (1994) MAZ-dependent termination between closely spaced human complement genes. *Embo J* 13(23):5656-5667.
5. Yonaha M & Proudfoot NJ (1999) Specific transcriptional pausing activates polyadenylation in a coupled in vitro system. *Mol Cell* 3(5):593-600.
6. Gowher H, Stuhlmann H, & Felsenfeld G (2008) Vezf1 regulates genomic DNA methylation through its effects on expression of DNA methyltransferase Dnmt3b. *Genes Dev* 22(15):2075-2084.
7. Recillas-Targa F, *et al.* (2002) Position-effect protection and enhancer blocking by the chicken beta-globin insulator are separable activities. *Proc Natl Acad Sci U S A* 99(10):6883-6888.
8. Cuello P, Boyd DC, Dye MJ, Proudfoot NJ, & Murphy S (1999) Transcription of the human U2 snRNA genes continues beyond the 3' box in vivo. *Embo J* 18(10):2867-2877.

## Sample statistics for ChIP-Seq experiments

| Antibody   | # lanes | # tags | # bound sites |
|------------|---------|--------|---------------|
| VEZF1      | 4       | 42 Mn  | 34,204        |
| Ser2-PolII | 3       | 42 Mn  | 114,443       |
| Input      | 3       | 42 Mn  | n/a           |

## Gowher\_S.table2

| Repeat         | Type           | Enrichment (fold) | OBS  | EXP  | -log10(P) | Repeat    | Type           | Enrichment (fold) | OBS | EXP | -log10(P) |
|----------------|----------------|-------------------|------|------|-----------|-----------|----------------|-------------------|-----|-----|-----------|
| Low complexity | Family         | 1.95              | 4106 | 1390 | < 300     | (CACCAT)n | Simple repeats | 6.56              | 27  | 4   | 11.39     |
| Simple repeats | Family         | 1.34              | 3929 | 1681 | < 300     | (CCCTG)n  | Simple repeats | 8.95              | 22  | 2   | 11.18     |
| GC-rich        | Low complexity | 52.73             | 3159 | 59   | < 300     | (CAGC)n   | Simple repeats | 18.48             | 15  | 1   | 10.92     |
| G-rich         | Low complexity | 16.87             | 430  | 24   | < 300     | (CACAC)n  | Simple repeats | 17.99             | 15  | 1   | 10.76     |
| C-rich         | Low complexity | 15.64             | 401  | 24   | < 300     | (CAGGG)n  | Simple repeats | 8.48              | 20  | 2   | 9.56      |
| (CGG)n         | Simple repeats | 60.48             | 383  | 6    | < 300     | (CTCG)n   | Simple repeats | 51.94             | 9   | 0   | 9.34      |
| (CCG)n         | Simple repeats | 56.99             | 370  | 6    | < 300     | (ATGGTG)n | Simple repeats | 5.76              | 25  | 4   | 9.31      |
| (CGGGG)n       | Simple repeats | 47.64             | 250  | 5    | < 300     | (CGAGG)n  | Simple repeats | 49.00             | 9   | 0   | 9.12      |
| (CCCCG)n       | Simple repeats | 50.20             | 234  | 5    | 299.05    | CT-rich   | Low complexity | 0.72              | 204 | 118 | 9.07      |
| (TG)n          | Simple repeats | 1.98              | 666  | 223  | 123.34    | (CCA)n    | Simple repeats | 3.92              | 30  | 6   | 8.21      |
| (CA)n          | Simple repeats | 1.81              | 631  | 225  | 105.96    | (TCCG)n   | Simple repeats | 26.27             | 9   | 0   | 6.81      |
| (CGGG)n        | Simple repeats | 43.59             | 70   | 2    | 83.85     | (GAATG)n  | Simple repeats | 4.18              | 23  | 4   | 6.15      |
| (CCGGG)n       | Simple repeats | 60.33             | 46   | 1    | 60.60     | (CGGA)n   | Simple repeats | 28.63             | 8   | 0   | 6.04      |
| (CCCCCG)n      | Simple repeats | 44.71             | 48   | 1    | 57.32     | (CGGAG)n  | Simple repeats | 59.00             | 6   | 0   | 5.68      |
| (CTG)n         | Simple repeats | 15.59             | 70   | 4    | 54.92     | (TCCCC)n  | Simple repeats | 4.21              | 21  | 4   | 5.45      |
| (CCCG)n        | Simple repeats | 30.41             | 49   | 2    | 50.78     | (CATG)n   | Simple repeats | 6.43              | 15  | 2   | 5.14      |
| (GGA)n         | Simple repeats | 11.68             | 71   | 6    | 48.02     | GA-rich   | Low complexity | 0.57              | 187 | 119 | 5.03      |
| (CGGGGG)n      | Simple repeats | 35.61             | 41   | 1    | 44.77     | (CCCCCT)n | Simple repeats | 9.68              | 11  | 1   | 4.65      |
| (CCCCG)n       | Simple repeats | 51.24             | 35   | 1    | 43.18     | (TCG)n    | Simple repeats | 49.00             | 5   | 0   | 3.90      |
| (CGTG)n        | Simple repeats | 25.01             | 45   | 2    | 42.90     | (CTCGG)n  | Simple repeats | 44.45             | 5   | 0   | 3.70      |
| (TCC)n         | Simple repeats | 10.07             | 68   | 6    | 42.23     | (TCCC)n   | Simple repeats | 2.31              | 24  | 7   | 2.92      |
| (CAG)n         | Simple repeats | 12.84             | 53   | 4    | 37.15     | (CAGCC)n  | Simple repeats | 7.00              | 10  | 1   | 2.87      |
| (CACG)n        | Simple repeats | 22.68             | 36   | 2    | 32.46     | (CTCG)n   | Simple repeats | 28.41             | 5   | 0   | 2.77      |
| MER52A         | LTR            | 3.31              | 109  | 25   | 30.97     | (GGGA)n   | Simple repeats | 3.26              | 17  | 4   | 2.75      |
| tRNA           | tRNA           | 6.58              | 65   | 9    | 30.71     | (C)n      | Simple repeats | 12.73             | 7   | 1   | 2.73      |
| (CGCGG)n       | Simple repeats | 42.86             | 25   | 1    | 28.32     | (CACC)n   | Simple repeats | 4.51              | 13  | 2   | 2.68      |
| (CCGCG)n       | Simple repeats | 46.06             | 24   | 1    | 27.81     | U1        | snRNA          | 7.33              | 9   | 1   | 2.46      |
| (CG)n          | Simple repeats | 32.80             | 24   | 1    | 24.45     | (CACGC)n  | Simple repeats | 35.36             | 4   | 0   | 2.04      |
| (CTGGGG)n      | Simple repeats | 9.98              | 37   | 3    | 21.83     | (CCTG)n   | Simple repeats | 6.09              | 9   | 1   | 1.90      |
| MER52D         | LTR            | 5.44              | 51   | 8    | 20.52     | (CATT)n   | Simple repeats | 4.45              | 11  | 2   | 1.83      |
| (CCCCAG)n      | Simple repeats | 9.97              | 34   | 3    | 19.86     | (GCCTG)n  | Simple repeats | 15.13             | 5   | 0   | 1.52      |
| (TGG)n         | Simple repeats | 5.43              | 42   | 7    | 16.48     | (AGGGGG)n | Simple repeats | 6.34              | 8   | 1   | 1.51      |
| (GTGTG)n       | Simple repeats | 20.51             | 20   | 1    | 16.19     | (CGGTG)n  | Simple repeats | 59.00             | 3   | 0   | 1.48      |
| (CGAG)n        | Simple repeats | 53.17             | 13   | 0    | 14.73     | (CGA)n    | Simple repeats | 59.00             | 3   | 0   | 1.48      |
| (CCGAG)n       | Simple repeats | 90.67             | 11   | 0    | 14.56     | (AGGTG)n  | Simple repeats | 14.63             | 5   | 0   | 1.45      |
| (GGCTG)n       | Simple repeats | 13.18             | 19   | 1    | 12.01     | (GGGA)n   | Simple repeats | 2.01              | 20  | 7   | 1.45      |

VeZF1 binding sites are enriched for many GC-rich repeat elements. Only over-represented repeats are shown.
